# Supplementary material for: Association between medical male circumcision and HIV risk compensation among heterosexual men: a systematic review and meta-analysis
Source: PubMed Central journal article supplement (PMC8690595; doi:10.1016/s2214-109x(21)00102-9), 2021-04-30
Supplement: NIHMS1715711-supplement-1.pdf [file NIHMS1715711-supplement-1.pdf]

# THE LANCET

## Global Health

### Supplementary appendix

This appendix formed part of the original submission and has been peer reviewed.  
We post it as supplied by the authors.

Supplement to: Gao Y, Yuan T, Zhan Y, et al. Association between medical male circumcision and HIV risk compensation among heterosexual men: a systematic review and meta-analysis. *Lancet Glob Health* 2021; published online April 30.  
[http://dx.doi.org/10.1016/S2214-109X\(21\)00102-9](http://dx.doi.org/10.1016/S2214-109X(21)00102-9).

## Supplementary files

|                                                                                                                                                                     |    |
|---------------------------------------------------------------------------------------------------------------------------------------------------------------------|----|
| Abbreviations used in the supplementary files .....                                                                                                                 | 2  |
| Supplementary Text. Further details on methods .....                                                                                                                | 3  |
| Supplementary Text 1. Data extraction.....                                                                                                                          | 3  |
| Supplementary Text 2. Quality assessment scale .....                                                                                                                | 5  |
| Supplementary Text 3. Data analysis.....                                                                                                                            | 10 |
| Supplementary Table S1. Characteristics of included studies examining the association between MMC and condomless sex among heterosexual men .....                   | 11 |
| Supplementary Table S2. Characteristics of included studies examining the association between MMC and multiple sex partners among heterosexual men .....            | 16 |
| Supplementary Table S3. Univariate meta-regression analysis of the associations between MMC and condomless sex and multiple sex partners.....                       | 20 |
| Supplementary Table S4. Risk of bias assessment for cross-sectional studies – Newcastle-Ottawa Scale (adaptation).....                                              | 21 |
| Supplementary Table S5. Risk of bias assessment for cohort studies – Newcastle-Ottawa Scale (adaptation) .....                                                      | 22 |
| Supplementary Table S6. Risk of bias assessment for interventional studies - Cochrane Collaboration’s tool .....                                                    | 23 |
| Supplementary Table S7. Subgroup meta-analyses of studies conducted after 2007 of the association between MMC and HIV risk compensation among heterosexual men..... | 24 |
| Supplementary Figure S1. Sensitivity analysis of OR estimates on the association between MMC and condomless sex among heterosexual men.....                         | 25 |
| Supplementary Figure S2. Sensitivity analysis of OR estimates on the association between MMC and multiple sex partners among heterosexual men .....                 | 26 |
| Supplementary Figure S3. Funnel plot of the log OR estimates of the association between MMC and condomless sex among heterosexual men .....                         | 27 |
| Supplementary Figure S4. Funnel plot of the log OR estimates of the association between MMC and multiple sex partners among heterosexual men.....                   | 28 |
| References: .....                                                                                                                                                   | 29 |

## **Abbreviations used in the supplementary files**

CI = Confidence interval

LCB = The lower 95% CI bound of OR

MMC = Medical male circumcision

OR = Odds ratio

RCT = Randomized controlled trial

RR = Relative risk

SE = Standard error

UCB = The upper 95% CI bound of OR

WHO = World Health Organization

## Supplementary Text. Further details on methods

### Supplementary Text 1. Data extraction

1.1 Because we used ORs as association estimates in meta-analyses, we extracted ORs/RRs of no condom use/multiple sex partner comparing circumcised and uncircumcised male from included studies, with adjusted ORs/RRs extracted preferentially over unadjusted ORs/RRs.

1.2 If a study did not directly report ORs/RRs and/or 95% CIs, we extracted required data to calculate crude ORs and 95% CIs.

1.3 If cohort studies reported both baseline cross-sectional data and prospective incident data, incident data were preferentially extracted.

1.4 If the studies reported condom use consistency, last one-time condom use and unprotected sexual intercourse, we prioritized the extraction the condom use consistency data, followed by the unprotected sexual intercourse, and finally the last one-time condom use.

1.5 Some studies had applied a categorical variable of 3 levels, i.e., consistent condom use, inconsistent condom use, and no condom use. Other studies reported condom use behavior in a binary format i.e. unprotected intercourse in the previous several months or condom use in last one-time sex or consistent condom use and inconsistent condom use. For the purpose of consistency, the outcome variable was reconstructed in terms of reported condom use during any sexual activity. The reported condom use that was categorized as consistent, inconsistent and no use condom, while inconsistent condom use and no condom use were combined to one group, and consistent condom use as the other group.

1.6 If studies reported that there were any partners and non-marriage partners in the heterosexuals, we preferentially extracted data of any partner. When there was a contradiction between partner type and condom use, the principle of priority 1.4.

1.7 If studies reported the number of sex partners in different approach, we preferentially extracted data that could be classified by  $\leq 1$  and  $\geq 2$ . It was defined as multiple sex partners that the number of sex partners  $\geq 2$ . Some studies reported the number of any type sex partner while others reported the number of non-marriage partner. The number of sex partner was reset in a binary format i.e.  $\geq 2$  and  $\leq 1$ , no matter any partner or non-marriage partner or casual partner.

1.8 If studies reported marital status including married, married (not living with wife), married (living with wife), not married (no live-in partner), not married (with live-in partner), single, separated, divorced widowed and previously married, we redefined the married (living with wife), married and not married (with live-in partner) as married/cohabiting.

1.9 We extracted both the overall sample size and analytical sample of condomless sex and/or multiple sex partners. The analytical sample was used to compute association estimates between circumcision and condomless sex and multiple sex partners. Discrepancies between the analytical sample and overall sample size were due to missing data. For example, if a study recruited 1000 male and examined their circumcision status, but only 800 participants completed questionnaire survey or follow up visit, and 600 participants provided information data about condom use and/or reported their number of sex partner, then the overall sample size, observation/follow-up sample size, analytical sample of condom use and/or number of sex partner were 1000, 800, and 600, respectively.

1.10 If studies reported both median age and mean age, mean age was preferentially extracted.

## **Supplementary Text 2. Quality assessment scale**

### **Newcastle-Ottawa Scale adapted for cross-sectional studies**

#### **A. Selection: (Maximum 4 points)**

##### **1) Representativeness of the sample**

a) Representative of participant (score 1 point if one of the following items was fulfilled).

(1) Non-clinic-based sample: the study employed respondent driven sampling/mixed methods/venue-time-space sampling to recruit male from different sites.

(2) The study reanalyzed data from National Systems or randomized clinical trials.

b) Selected group of participants (score 0 point if one of the following items were fulfilled)

(1) Clinic-based sample.

(2) The study recruited male from only one site using convenience sampling.

c) No description of the derivation of the sample (score 0 point).

##### **2) Sample size**

a) Pre-determined and satisfactory (score 1 point).

b) Not pre-calculated (score 0 point).

##### **3) Non-respondents**

a) Score 1 point one of the following items were fulfilled:

(1) Comparability between respondent and non-respondent characteristics is established, and the response rate is satisfactory.

(2) Response rate =100%.

(3) The study employed multiple imputation approach to account for the uncertainty in missing responses.

b) The response rate is unsatisfactory, or the comparability between respondents and non-respondents is unsatisfactory (score 0 point).

c) No description of the response rate or the characteristics of the respondents and the non-respondents (score 0 point).

**4) Ascertainment of circumcision status**

a) Physical examination/medical record (score 1 point).

b) Self-reported (score 0 point).

c) No description (score 0 point).

**B. Comparability (Maximum 2 points)**

1) Study controlled for factors that lead to sexual risk behavior, such as alcohol consumption, recreational drugs use (score 1 point).

2) Study controlled for other demographic characteristics (score 1 point).

**C. Outcome (Maximum 3 points)**

**1) Assessment of the number of sex partner and condom use status**

a) Self-reported (score 1 point).

b) Other / no description (score 0 point).

**2) Statistical test**

a) The statistical test used to analyze the data is clearly described and appropriate, and the measurement of the association is presented, including confidence intervals (score 1 point).

b) The statistical test is not appropriate, not described or incomplete (score 0 point).

**Newcastle-Ottawa scale for cohort studies (adapted version)**

**A. Selection (Maximum 4 points)**

**1) Representatives of the sample**

a) Representative of participant (score 1 point if one of the following items were fulfilled).

(1) Non-clinic-based sample: the study employed respondent driven sampling/mixed methods/venue-time-space sampling to recruit male from different sites.

(2) The study reanalyzed data from National Systems or randomized clinical trials.

b) Selected group of participants (score 0 point if one of the following items were fulfilled)

(1) Clinic-based sample.

(2) The study recruited male from only one site using convenience sampling.

c) No description of the derivation of the sample.

### **2) Selection of the non-intervention cohort**

a) Drawn from the same source of population (score 1 point).

b) Drawn from a different source/No description (score 0 point).

### **3) Ascertainment of circumcision status**

a) Physical examination (score 1 point).

b) Self-reported/ No description (score 0 point).

### **4) Demonstration that outcome of interest was not present at start of study**

a) Yes (score 1 point).

b) No/unclear (score 0 point).

### **B. Comparability (Maximum 2 points)**

1) Study controlled for factors that lead to sexual risk behavior, such as alcohol consumption, recreational drugs use (score 1 point).

2) Study controlled for other demographic characteristics (score 1 point).

### **C. Outcome (Maximum 4 points)**

#### **1) Assessment of the number of sex partner and condom use status**



a) Self-reported (score 1 point).

b) Other / no description (score 0 point).

**2) Was follow up long enough for outcomes to occur?**

a) Yes, if median duration of follow-up  $\geq 6$  months (score 1 point).

b) No, if median duration of follow-up  $< 6$  months (score 0 point).

**3) Adequacy of follow up of cohorts**

a) Complete follow up: all subjects accounted for (score 1 point).

b) Subjects lost to follow up unlikely to introduce bias: number lost  $\leq 20\%$ , or description of those lost suggesting no different from those followed (score 0 point).

**Cochrane Collaboration's tool for assessing risk of bias of intervention studies**

**(A=low risk of bias, B=high risk of bias, C=unclear)**

**Sequence generation**

A: investigators described a random component in the sequence generation process, such as the use of random number table, coin tossing, card or envelope shuffling, etc.

B: investigators described a non-random component in the sequence generation process, such as the use of odd or even date of birth, algorithm based on the day or date of birth, hospital, or clinic record number.

C: insufficient information to permit judgement of the sequence generation process.

**Allocation concealment**

A: participants and the investigators enrolling participants cannot foresee assignment (e.g., central allocation; or sequentially numbered, opaque, sealed envelopes).

B: participants and investigators enrolling participants can foresee upcoming assignment (e.g., an open random allocation schedule, a list of random numbers); or envelopes were unsealed or non-opaque or not sequentially numbered.

C: insufficient information to permit judgement of the allocation concealment or the method not described.

**Blinding**

A: blinding of the participants, key study personnel, and outcome assessor, and unlikely that the blinding could have been broken. Or lack of blinding unlikely to introduce bias. No blinding in the situation where non-blinding is not likely to introduce bias.

B: no blinding, incomplete blinding and the outcome is likely to be influenced by lack of blinding.

C: insufficient information to permit judgement of adequacy or otherwise of the blinding.

**Incomplete outcome data**

A: no missing outcome data, reasons for missing outcome data unlikely to be related to true outcome, or missing outcome data balanced in number across groups.

B: reason for missing outcome data likely to be related to true outcome, with either imbalance in number across groups or reasons for missing data.

C: insufficient reporting of attrition or exclusions.

**Selective reporting**

A: a protocol is available which clearly states the primary outcome as the same as in the final trial report.

B: the primary outcome differs between the protocol and final trial report.

C: no trial protocol is available or there is insufficient reporting to determine if selective reporting is present.

**Other bias**

A: there is no evidence of bias from other sources.

B: there is potential bias present from other sources (e.g., early stopping of trial, fraudulent activity, extreme baseline imbalance, or bias related to specific study design).

C: insufficient information to permit judgement of adequacy or otherwise of other forms of bias.

Note: It is impossible to blind participants and the personnel delivering a circumcision intervention. Hence, we did not assess the risk of study bias in blinding, and only assessor blinding is considered.

### Supplementary Text 3. Data analysis

#### 3.1 Calculation of crude ORs and their 95% CIs

If a study did not directly report ORs and their 95% CIs, we first reconstructed the following fourfold table:

|               | No condom use/ Number of sex partner $\geq 2$ | Condom use/ Number of sex partner $\leq 1$ |
|---------------|-----------------------------------------------|--------------------------------------------|
| Circumcised   | a                                             | b                                          |
| Uncircumcised | c                                             | d                                          |

Where a, b, c, and d, are the number of men.

We then used the following command of Stata version 15.1 to calculate crude ORs and their 95% CIs: `cci a b c d, exact`

#### 3.3 Meta-analysis

We calculated pooled OR estimates and their 95% CIs with natural log-transformed ORs (logORs) and SEs, based on the DerSimonian-Laird inverse variance method.

$$SE_{\log(OR)} = (\log(UCB) - \log(LCB)) / 3.92$$

where UCB is the upper 95% CI bound and LCB is the lower 95% CI bound of OR.

Pooled ORs and their 95% CIs were then back-transformed to the original scale.

**Supplementary Table S1. Characteristics of included studies examining the association between MMC and condomless sex among heterosexual men**

| Study (country)                                | Enrollment period/Study design                | WHO region/<br>income level <sup>a</sup> | Circumcision time | Setting/<br>Participant No. | Mean and/or median age of circumcision men, year | Married/<br>cohabiting, (%) | Circumcision ascertainment, No./ Prevalence, No. (%) | Follow up /retrospective duration <sup>b</sup> | Condom use ascertainment/ Analytic sample, No. <sup>c</sup> | Condomless                     |                                  | (Adjusted/<br>crude)<br>OR<br>(95%CI) <sup>d</sup> | Type of partner for condomless | condom use period or observation time | Risk of bias <sup>e</sup> :<br>Participant selection/Comparability/Outcome or exposure |
|------------------------------------------------|-----------------------------------------------|------------------------------------------|-------------------|-----------------------------|--------------------------------------------------|-----------------------------|------------------------------------------------------|------------------------------------------------|-------------------------------------------------------------|--------------------------------|----------------------------------|----------------------------------------------------|--------------------------------|---------------------------------------|----------------------------------------------------------------------------------------|
|                                                |                                               |                                          |                   |                             |                                                  |                             |                                                      |                                                |                                                             | No. Circumcised/ Total No. (%) | No. Uncircumcised/ Total No. (%) |                                                    |                                |                                       |                                                                                        |
| Kong et al. 2012 <sup>1</sup><br>(Uganda)      | 2007-2011/<br>Prospective cohort              | Africa/Low income                        | 2006-2010         | Non-clinic-based /2137      | Not reported                                     | 996/1597<br>(62.4)          | Genital examination, -                               | Baseline                                       | self-reported/1362                                          | 961/1101<br>(87.3)             | 229/261<br>(87.7)                | -                                                  | Any                            | Previous 12 months                    | 4/2/2                                                                                  |
|                                                |                                               |                                          |                   |                             |                                                  |                             | Genital examination, 1297 /1597 (81.2)               | 3-13 year                                      | Self-reported /1362                                         | 1025/1101<br>(93.1)            | 242/261<br>(92.7)                | Crude:1.06<br>(0.63,1.78)                          | Any                            | 3-13 years                            |                                                                                        |
| Feldblum et al. 2015 <sup>2</sup> (Kenya)      | 2012/ Prospective cohort <sup>f</sup>         | Africa/Lower-middle income               | 2012              | Clinic-based /199           | 24.8/22                                          | -                           | Genital examination, 194 /388 (50.0)                 | 32months                                       | Self-reported /349                                          | 147/194<br>(75.8)              | 92/155<br>(59.4)                 | Crude:2.14<br>(1.35,3.39)                          | Any                            | 32 months                             | 3/1/3                                                                                  |
| Mukudu et al. 2019 <sup>3</sup> (South Africa) | 2012-2014/<br>Prospective cohort <sup>f</sup> | Africa/Upper-middle income               | 2012-2014         | Clinic-based /496           | 25.5                                             | -                           | Genital examination, 233 /466 (50.0)                 | 12 months                                      | Self-reported /466                                          | 121/233<br>(51.9)              | 141/233<br>(60.5)                | Crude:0.70<br>(0.49,1.02)                          | Any                            | last time                             | 3/2/3                                                                                  |
| Agot et al. 2007 <sup>4</sup> (Kenya)          | 2002-2004/<br>Prospective cohort              | Africa/Lower-middle income               | 2002-2004         | Non-clinic-based /648       | 22.3                                             | 134/648<br>(20.1)           | Genital examination, -                               | Baseline                                       | Self-reported /648                                          | 141/324<br>(43.5)              | 152/324<br>(46.9)                | -                                                  | Any                            | Not reported                          | 4/1/3                                                                                  |
|                                                |                                               |                                          |                   |                             |                                                  |                             | Genital examination, 187/375 (49.9)                  | 6 months                                       | Self-reported /375                                          | 143/187<br>(76.5)              | 138/188<br>(73.4)                | Crude:1.18<br>(0.74,1.89)                          | Non-marriage                   | 6 months                              |                                                                                        |
|                                                |                                               |                                          |                   |                             |                                                  |                             | Genital examination, 193/374 (51.6)                  | 9 months                                       | Self-reported /374                                          | 146/193<br>(75.6)              | 138/181<br>(76.2)                | Crude:0.97<br>(0.60,1.56)                          | Non-marriage                   | 9 months                              |                                                                                        |
|                                                |                                               |                                          |                   |                             |                                                  |                             | Genital examination, 165/350 (47.1)                  | 12 months                                      | Self-reported /350                                          | 115/165<br>(69.7)              | 133/185<br>(71.9)                | Crude:0.92<br>(0.58,1.46)                          | Non-marriage                   | 12 months                             |                                                                                        |
| Bailey et al. 2007 <sup>5</sup><br>(Kenya)     | 2002-2005/ RCT                                | Africa/Lower-middle income               | 2002-2005         | Non-clinic-based /2784      | 20.0                                             | 156/2773<br>(5.6)           | Genital examination, -                               | Baseline                                       | Self-reported /2386                                         | 928/1193<br>(77.8)             | 939/1193<br>(78.7)               | -                                                  | Any                            | Previous 6 months                     | Low                                                                                    |
|                                                |                                               |                                          |                   |                             |                                                  |                             | Genital examination, 1040/2086 (49.9)                | 6 months                                       | Self-reported /2086                                         | 670/1040<br>(64.4)             | 668/1046<br>(63.9)               | Crude:1.02<br>(0.85,1.22)                          | Any                            | 6 months                              |                                                                                        |
|                                                |                                               |                                          |                   |                             |                                                  |                             | Genital examination, -                               | 12 months                                      | Self-reported                                               | 681/1039                       | 627/1025                         | Crude:1.20                                         | Any                            | 12 months                             |                                                                                        |

|                                             |                                 |                            |           |                        |              |                  |                                       |           |                     |                  |                  |                         |              |                    |       |
|---------------------------------------------|---------------------------------|----------------------------|-----------|------------------------|--------------|------------------|---------------------------------------|-----------|---------------------|------------------|------------------|-------------------------|--------------|--------------------|-------|
|                                             |                                 |                            |           |                        |              |                  | 1039/2064 (50.3)                      |           | /2064               | (65.5)           | (61.2)           | (1.01,1.45)             |              |                    |       |
|                                             |                                 |                            |           |                        |              |                  | Genital examination, 830/1652 (50.2)  | 18 months | Self-reported /1652 | 534/830 (64.3)   | 518/822 (63.0)   | Crude:1.06 (0.87,1.30)  | Any          | 18 months          |       |
|                                             |                                 |                            |           |                        |              |                  | Genital examination, 637/1232 (51.7)  | 24 months | Self-reported /1232 | 406/637 (63.7)   | 349/595 (58.7)   | Crude:1.24 (0.98,1.56)  | Any          | 24 months          |       |
| Gray et al. 2007 <sup>6</sup> (Uganda)      | 2004-2006/ RCT                  | Africa/Low income          | 2004-2006 | Non-clinic-based /4996 | Not reported | 2340/4996 (46.8) | Genital examination, -                | Baseline  | Self-reported /4034 | 1667/2006 (83.1) | 1673/2028 (82.5) | -                       | Any          | Previous 12 months | Low   |
|                                             |                                 |                            |           |                        |              |                  | Genital examination, 1801/3588 (50.2) | 6 months  | Self-reported /3588 | 1467/1801 (81.5) | 1492/1787 (83.5) | Crude:0.87 (0.73,1.03)  | Any          | 6 months           |       |
|                                             |                                 |                            |           |                        |              |                  | Genital examination, 1815/3588 (50.6) | 12 months | Self-reported /3588 | 1482/1815 (81.7) | 1450/1773 (81.8) | Crude:0.99 (0.84,1.18)  | Any          | 12 months          |       |
|                                             |                                 |                            |           |                        |              |                  | Genital examination, 846/1696 (49.9)  | 24 months | Self-reported /1696 | 688/846 (81.3)   | 690/850 (81.2)   | Crude:1.01 (0.79,1.29)  | Any          | 24 months          |       |
| Westercamp et al. 2014 <sup>7</sup> (Kenya) | 2008-2010/ Prospective cohort   | Africa/Lower-middle income | 2008-2010 | Non-clinic-based /3186 | 20.0         | 1095/3186 (34.4) | Genital examination, -                | Baseline  | Self-reported /2570 | 693/1263 (53.0)  | 672/1307 (51.4)  | -                       | Any          | last time          | 4/0/2 |
|                                             |                                 |                            |           |                        |              |                  | Genital examination, 1263/2355 (53.6) | 6 months  | Self-reported /2355 | 810/1263 (64.1)  | 522/1092 (47.8)  | Crude:1.96 (1.67,2.33)  | Any          | last time          |       |
|                                             |                                 |                            |           |                        |              |                  | Genital examination, 1151/2308 (49.9) | 12 months | Self-reported /2308 | 480/1151 (41.7)  | 556/1157 (48.1)  | Crude:0.78 (0.66,0.91)  | Any          | last time          |       |
|                                             |                                 |                            |           |                        |              |                  | Genital examination, 1321/2425 (54.5) | 18 months | Self-reported /2425 | 518/1321 (39.2)  | 509/1104 (46.1)  | Crude:0.75 (0.64,0.78)  | Any          | last time          |       |
|                                             |                                 |                            |           |                        |              |                  | Genital examination, 1468/2517 (58.3) | 24 months | Self-reported /2517 | 571/1468 (38.9)  | 506/1049 (48.2)  | Crude:0.68 (0.58,0.80)  | Any          | last time          |       |
| Kagaayi et al. 2016 <sup>8</sup> (Uganda)   | 2008-2011/ Retrospective cohort | Africa/Low income          | 2006-2009 | Non-clinic-based /5494 | 26.1         | 2787/4907 (56.8) | Genital examination, -                | Baseline  | Self-reported /1955 | 113/261 (43.3)   | 727/1694 (42.9)  | -                       | Any          | last time          | 4/1/3 |
|                                             |                                 |                            |           |                        |              |                  | Genital examination, 578/4907 (11.8)  | 18 months | Self-reported /1954 | 101/251 (40.2)   | 763/1703 (44.8)  | Crude :0.83 (0.63,1.09) | Non-marriage | last time          |       |
| Govender et al.                             | 2011-2013/                      | Africa/Upper-              | 2011-2013 | Non-clinic-            | 17.3         | -                | Genital examination, -                | Baseline  | Self-reported       | 64/194           | 69/253           | -                       | Any          | Not                | 4/0/2 |

|                                                 |                                              |                             |                           |                        |              |                  |                                       |                    |                                     |                 |                    |                         |               |                    |               |                        |     |           |
|-------------------------------------------------|----------------------------------------------|-----------------------------|---------------------------|------------------------|--------------|------------------|---------------------------------------|--------------------|-------------------------------------|-----------------|--------------------|-------------------------|---------------|--------------------|---------------|------------------------|-----|-----------|
| 2018 <sup>9</sup> (South Africa)                | Retrospective cohort                         | middle income               |                           | based /981             |              |                  |                                       |                    | /447                                | (33.0)          | (27.3)             |                         | reported      |                    |               |                        |     |           |
|                                                 |                                              |                             |                           |                        |              |                  |                                       |                    | Genital examination, 393/755 (52.1) | 6 months        | Self-reported /423 |                         | 53/225 (23.6) |                    | 49/198 (24.7) | Crude:0.93 (0.60,1.47) | Any | 6 months  |
|                                                 |                                              |                             |                           |                        |              |                  |                                       |                    | Genital examination, 420/858 (49.0) | 12 months       | Self-reported /523 |                         | 45/232 (19.4) |                    | 52/291 (17.9) | Crude:1.11 (0.71,1.72) | Any | 12 months |
| Brito et al. 2017 <sup>10</sup> (Dominican)     | 2013-2014/<br>Prospective cohort             | America/Upper-middle income | 2013-2014                 | Non-clinic-based /454  | 26.0         | -                | Genital examination, 317 /634 (50.0)  | 6-24months         | Self-reported /634                  | 192/316 (60.8)  | 182/317 (57.4)     | Crude:1.15 (0.84,1.58)  | Any           | last time          | 2/2/3         |                        |     |           |
| Tarnaud et al 2011 <sup>11</sup> (South Africa) | 2002-2004/ RCT                               | Africa/Upper-middle income  | 2002-2004                 | Non-clinic-based /1753 | 21.2         | 47/934(5.0)      | Genital examination, 890/1753 (50.8)  | 21 months          | Self-reported /934                  | 373/497 (73.0)  | 334/437 (76.4)     | Crude:0.93 (0.69,1.25)  | Any           | 12 months          | Low           |                        |     |           |
| Bailey et al. 1999 <sup>12</sup> (Uganda)       | 1997/Cross-sectional                         | Africa/Low income           | Not reported              | Non-clinic-based /365  | 30.8         | -                | Not reported, 144/320 (45.0)          | last time          | Self-reported /320                  | 125/144 (86.8)  | 155/176 (88.1)     | Crude :0.89 (0.46,1.73) | Non-marriage  | last time          | 1/2/2         |                        |     |           |
| Ayiga et al. 2011 <sup>13</sup> (Botswana)      | 2008/<br>Cross-sectional                     | Africa/Upper-middle income  | infancy and after infancy | Non-clinic-based /1257 | Not reported | -                | Self-reported, 116/1192 (9.7)         | last time          | Self-reported /1192                 | 18/116 (15.5)   | 126/1076 (11.7)    | Crude:1.38 (0.81,2.37)  | Any           | last time          | 1/0/1         |                        |     |           |
| Forbes et al. 2012 <sup>14</sup> (Tanzania)     | 2007-2008/<br>Cross-sectional <sup>g</sup>   | Africa/Low income           | 1999-2002                 | Non-clinic-based /7300 | 22.0         | 2444/7300 (33.5) | Genital examination, 1436/3509 (40.9) | Previous 1 month   | Self-reported /3509                 | 577/1436 (40.2) | 1290/2073 (62.2)   | Crude :0.41 (0.36,0.47) | Non-marriage  | Previous 1 month   | 1/0/2         |                        |     |           |
| Auvert et al. 2013 <sup>15</sup> (South Africa) | 2007-2008/<br>Cross-sectional <sup>g</sup>   | Africa/Upper-middle income  | 2007-2008                 | Non-clinic-based /1998 | Not reported | 262/1988 (13.2)  | Genital examination, 329/1988 (16.5)  | Previous 12 months | Self-reported /1474                 | 169/272 (62.1)  | 648/1202 (53.9)    | Crude:1.40 (1.07,1.84)  | Non-marriage  | Previous 12 months | 2/0/2         |                        |     |           |
|                                                 | 2010 - 2011/<br>Cross-sectional <sup>g</sup> |                             | 2008-2010                 | Non-clinic-based /3338 | 24.5         | 803/3338 (24.1)  | 1531/2678 (57.2)                      | Previous 12 months | Self-reported /2678                 | 873/1531 (57.0) | 644/1147 (56.1)    | Crude:1.04 (0.89,1.21)  | Non-marriage  | Previous 12 months |               |                        |     |           |
| Galbraith et al. 2014 <sup>16</sup> (Kenya)     | 2012/<br>Cross-sectional                     | Africa/Lower-middle income  | Not reported              | Non-clinic-based /874  | Not reported | 261/847 (30.8)   | Self-reported, 435/874 (49.8)         | Previous 12 months | Self-reported /415                  | 90/153 (58.8)   | 220/262 (84.0)     | Crude:0.27 (0.17,0.43)  | Any           | Previous 12 months | 1/0/1         |                        |     |           |
| Balekang et al. 2016 <sup>17</sup> (Botswana)   | 2008/<br>Cross-sectional                     | Africa/Upper-middle income  | Not reported              | Non-clinic-based /313  | Not reported | 251/301 (83.4)   | Not reported, 53/313 (16.9)           | Previous 12 months | Self-reported /229                  | 15/42 (35.7)    | 54/187 (28.9)      | Crude:1.37 (0.68,2.77)  | Any           | Previous 12 months | 1/0/1         |                        |     |           |
| Kibira et al. 2016 <sup>18</sup> (Uganda)       | 2004/<br>Cross-sectional                     | Africa/Low income           | Not reported              | Non-clinic-based /9905 | Not reported | 4621/6906 (66.9) | Self-reported, 1792/6906 (25.9)       | last time          | Self-reported /2039                 | 290/636 (45.6)  | 692/1403 (49.3)    | Crude :0.86 (0.71,1.04) | Non-marriage  | last time          | 1/0/2         |                        |     |           |
|                                                 | 2011/<br>Cross-sectional                     |                             | Not reported              | Non-clinic-based /9983 | Not reported | 5710/7969 (71.7) | 2228/7969 (28.0)                      | last time          | Self-reported /2315                 | 448/768 (58.3)  | 819/1547 (52.9)    | Crude :1.24 (1.04,1.48) | Non-marriage  | last time          |               |                        |     |           |

|                                                         |                                            |                                            |              |                            |              |                     |                                          |                       |                        |                     |                     |                           |                  |                       |       |
|---------------------------------------------------------|--------------------------------------------|--------------------------------------------|--------------|----------------------------|--------------|---------------------|------------------------------------------|-----------------------|------------------------|---------------------|---------------------|---------------------------|------------------|-----------------------|-------|
| Zungu et al. 2016 <sup>19</sup><br>(South Africa)       | 2012/<br>Cross-sectional                   | Africa/Upper-<br>middle income             | Not reported | Non-clinic-<br>based /8240 | Not reported | -                   | Self-reported,<br>2121/8240 (25·7)       | last time             | Self-reported<br>/4961 | 944/1440<br>(65·6)  | 2380/3521<br>(67·6) | Crude:0·91<br>(0·80,1·04) | Any              | last time             | 1/0/2 |
| George et al.<br>2017 <sup>20</sup> (South<br>Africa)   | 2012-2013/<br>Cross-sectional              | Africa/Upper-<br>middle income             | 2011-2013    | Non-clinic-<br>based /750  | 16·8         | -                   | Genital examination,<br>251/750 (33·5)   | Previous 1<br>month   | Self-reported<br>/750  | 148/251<br>(59·0)   | 309/499<br>(61·9)   | Crude:0·88<br>(0·65,1·20) | Any              | Previous 1<br>month   | 2/0/1 |
| Westercamp et al.<br>2017 <sup>21</sup> (Kenya)         | 2008-2009/<br>Cross-sectional              | Africa/Lower-<br>middle income             | Not reported | Non-clinic-<br>based /1210 | 24·0         | 326/675<br>(48·3)   | Self-reported, 215/675<br>(31·9)         | Previous 12<br>months | Self-reported<br>/525  | 113/187<br>(60·4)   | 215/338<br>(63·5)   | Crude:0·87<br>(0·60,1·26) | Non-marria<br>ge | Previous<br>12 months | 1/0/1 |
|                                                         | 2011/<br>Cross-sectional                   |                                            |              | Non-clinic-<br>based /1540 | 26·0         | 823/1371<br>(60·0)  | Self-reported,<br>669/1371 (48·8)        | Previous 12<br>months | Self-reported<br>/967  | 260/456<br>(57·0)   | 326/511<br>(63·7)   | Crude:0·75<br>(0·58,0·98) | Non-marria<br>ge | Previous<br>12 months |       |
|                                                         | 2013/<br>Cross-sectional                   |                                            |              | Non-clinic-<br>based /1442 | 27·0         | 741/1308<br>(56·7)  | Self-reported,<br>781/1308 (59·7)        | Previous 12<br>months | Self-reported<br>/955  | 233/551<br>(42·2)   | 177/404<br>(43·7)   | Crude:0·94<br>(0·73,1·22) | Non-marria<br>ge | Previous<br>12 months |       |
| Ortblad, et al.<br>2019 <sup>22</sup> (South<br>Africa) | 2009-2015/<br>Cross-sectional <sup>g</sup> | Africa/Upper-<br>middle income             | Not reported | Non-clinic-<br>based /5127 | 17·0         | -                   | Self-reported,<br>1235/5127 (24·1)       | last time             | Self-reported<br>/5127 | 110/1235<br>(8·9)   | 552/3892<br>(14·2)  | Crude:0·59<br>(0·48,0·73) | Any              | last time             | 2/0/2 |
| Kufa et al. 2020 <sup>23</sup><br>(South Africa)        | 2017-2018/<br>Cross-sectional              | Africa/Upper-<br>middle income             | Not reported | Non-clinic-<br>based /750  | 27·0         | -                   | Genital examination,<br>166/496 (33·5)   | last time             | Self-reported<br>/496  | 137/166<br>(82·5)   | 271/330<br>(82·1)   | Crude:1·03<br>(0·63,1·68) | Any              | last time             | 3/1/2 |
| Wei et al. 2018 <sup>24</sup><br>(China)                | 2004/<br>Cross-sectional <sup>g</sup>      | Western<br>Pacific/Upper-<br>middle income | Not reported | Non-clinic-<br>based /673  | 28·0         | 499/673<br>(74·1)   | Genital examination,<br>113/673 (16·8)   | Not reported          | Self-reported<br>/673  | 100/113<br>(88·5)   | 511/560<br>(91·2)   | Crude:0·74<br>(0·39,1·41) | Any              | Not<br>reported       | 4/1/1 |
| Mwandi et al.<br>2012 <sup>25</sup> (Kenya)             | 2007/<br>Cross-sectional                   | Africa/Lower-<br>middle income             | Not reported | Non-clinic-<br>based /8883 | 32·0         | 4469/7678<br>(58·2) | Genital examination,<br>6586/7678 (85·8) | Previous 12<br>months | Self-reported<br>/5747 | 4389/4990<br>(88·0) | 633/757<br>(83·6)   | Crude:1·43<br>(1·16,1·77) | Any              | Previous<br>12 months | 3/1/1 |
| Reed et al. 2012 <sup>26</sup><br>(Swaziland)           | 2010-2011/<br>Cross-sectional              | Africa/Lower-<br>middle income             | 2009         | Non-clinic-<br>based /7075 | 21·1         | -                   | Genital examination,<br>1105/7075 (15·6) | Previous 6<br>months  | Self-reported<br>/7075 | 674/1105<br>(61·0)  | 4000/5970<br>(67·0) | Crude:0·77<br>(0·67,0·88) | Any              | Previous 6<br>months  | 3/1/1 |

<sup>a</sup> Studies grouped by country in which the study was conducted.

<sup>b</sup> Prospective period and retrospective period were used in cohort, and retrospective period was used in cross-sectional study.

<sup>c</sup> The analytic sample was used to calculate the association between circumcision and condomless sex and multiple sex partner. Discrepancies between analytic samples and overall sample size were due to missing data.

<sup>d</sup> ORs were extracted directly from articles were available, with adjusted odds ratios extracted preferentially over unadjusted odds ratios. Crude ORs were calculated based on reconstructed fourfold tables if they were not reported.

<sup>e</sup> The adapted version of the Newcastle-Ottawa Scale was used to assess risk of bias of studies along three aspects: participant selection (4 criteria), comparability between study groups (1 criterion), and assessment of outcome or exposure (3 criteria for cohort, 2 criteria for cross-sectional studies).

<sup>f</sup> Study did not have a control group at baseline, and comparison before and after follow-up.

<sup>g</sup> Cross-sectional information from cohort.

A total of 26 studies reported condom use status.



**Supplementary Table S2. Characteristics of included studies examining the association between MMC and multiple sex partners among heterosexual men**

| Study (country)                                | Enrollment period/Study design             | WHO region/Income Level <sup>a</sup> | Circumcision time | Setting/ Participant No. | Mean or median age, year | Married/ cohabiting, (%) | Circumcision ascertainment, No. /Prevalence, No. (%) | Follow up /retrospective duration <sup>b</sup> | Number of sex partner ascertainment / Analytic sample, No. <sup>c</sup> | Number of sex partners ≥ 2     |                                  | (Adjusted/ crude) OR (95% CI) <sup>d</sup> | Type of sexual partner | Risk of bias <sup>e</sup> : Participant selection/Comparability/Outcome or exposure |
|------------------------------------------------|--------------------------------------------|--------------------------------------|-------------------|--------------------------|--------------------------|--------------------------|------------------------------------------------------|------------------------------------------------|-------------------------------------------------------------------------|--------------------------------|----------------------------------|--------------------------------------------|------------------------|-------------------------------------------------------------------------------------|
|                                                |                                            |                                      |                   |                          |                          |                          |                                                      |                                                |                                                                         | No. Circumcised /Total No. (%) | No. Uncircumcised /Total No. (%) |                                            |                        |                                                                                     |
| Kong et al. 2012 <sup>1</sup> (Uganda)         | 2007-2011/ Prospective cohort              | Africa/Low income                    | 2006-2010         | Non-clinic-based /2137   | Not reported             | 996/1597 (62.4)          | Genital examination, -                               | Baseline                                       | Self-reported /1597                                                     | 444/1297 (34.2)                | 101/300 (33.7)                   | -                                          | Any                    | 4/2/2                                                                               |
|                                                |                                            |                                      |                   |                          |                          |                          | Genital examination, 1297/1597 (81.2)                | 3.13 year                                      | Self-reported /1597                                                     | 468/1297 (36.1)                | 126/300 (42.0)                   | Crude:0.78 (0.60,1.01)                     | Any                    |                                                                                     |
| Feldblum et al. 2015 <sup>2</sup> (Kenya)      | 2012/ Prospective cohort <sup>f</sup>      | Africa/Lower-middle income           | 2012              | Clinic-based /199        | 24.8                     | -                        | Genital examination, 194/388 (50.0)                  | 32 months                                      | Self-reported /349                                                      | 82/194 (42.3)                  | 45/155 (29.0)                    | Crude:1.79 (1.14,2.80)                     | Any                    | 3/1/3                                                                               |
| Mukudu et al. 2019 <sup>3</sup> (South Africa) | 2012-2014/ Prospective cohort <sup>f</sup> | Africa/Upper-middle income           | 2012-2014         | Clinic-based /496        | Not reported             | -                        | Genital examination, 233/466 (50.0)                  | 12 months                                      | Self-reported /466                                                      | 71/233 (30.5)                  | 70/233 (30.0)                    | Crude:1.02 (0.69,1.52)                     | Any                    | 3/2/3                                                                               |
| Agot et al. 2007 <sup>4</sup> (Kenya)          | 2002-2004/ Prospective cohort              | Africa/Lower-middle income           | 2002-2004         | Non-clinic-based /648    | 22.3                     | 134/648 (20.7)           | Genital examination, -                               | Baseline                                       | Self-reported /648                                                      | 20/324 (6.2)                   | 15/324 (4.6)                     | -                                          | Any                    | 4/1/3                                                                               |
|                                                |                                            |                                      |                   |                          |                          |                          | Genital examination, 298/579 (51.5)                  | 6 months                                       | Self-reported /579                                                      | 9/298 (3.0)                    | 11/281 (3.9)                     | Crude:0.76 (0.31,1.89)                     | Non-marriage           |                                                                                     |
|                                                |                                            |                                      |                   |                          |                          |                          | Genital examination, 291/561 (51.9)                  | 9 months                                       | Self-reported /561                                                      | 5/291 (1.7)                    | 8/270 (3.0)                      | Crude:0.57 (0.18,1.79)                     | Non-marriage           |                                                                                     |
|                                                |                                            |                                      |                   |                          |                          |                          | Genital examination, 288/557 (51.7)                  | 12 months                                      | Self-reported /557                                                      | 5/288 (1.7)                    | 7/269 (2.6)                      | Crude:0.66 (0.21,2.11)                     | Non-marriage           |                                                                                     |
| Bailey et al. 2007 <sup>5</sup> (Kenya)        | 2002-2005/ RCT                             | Africa/Lower-middle income           | 2002-2005         | Non-clinic-based /2784   | 20.0                     | 156/2773 (5.6)           | Genital examination, -                               | Baseline                                       | Self-reported /2777                                                     | 585/1388 (42.1)                | 579/1389 (41.7)                  | -                                          | Any                    | low                                                                                 |
|                                                |                                            |                                      |                   |                          |                          |                          | Genital examination, 1232/2495 (49.4)                | 6 months                                       | Self-reported /2495                                                     | 409/1232 (33.2)                | 443/1263 (35.1)                  | Crude:0.92 (0.78,1.09)                     | Any                    |                                                                                     |
|                                                |                                            |                                      |                   |                          |                          |                          | Genital examination, 1227/2455 (50.0)                | 12 months                                      | Self-reported /2456                                                     | 360/1227 (29.3)                | 408/1229 (33.2)                  | Crude:0.83 (0.71,0.99)                     | Any                    |                                                                                     |

|                                                     |                                    |                            |           |                        |              |                  |                                       |           |                     |                 |                  |                         |     |       |
|-----------------------------------------------------|------------------------------------|----------------------------|-----------|------------------------|--------------|------------------|---------------------------------------|-----------|---------------------|-----------------|------------------|-------------------------|-----|-------|
|                                                     |                                    |                            |           |                        |              |                  | Genital examination, 985/1973 (49.9)  | 18 months | Self-reported /1973 | 294/985 (29.8)  | 300/988 (30.4)   | Crude:0.98 (0.81,1.18)  | Any |       |
|                                                     |                                    |                            |           |                        |              |                  | Genital examination, 741/1469 (50.4)  | 24 months | Self-reported /1469 | 225/741 (30.4)  | 199/728 (27.3)   | Crude:1.16 (0.92,1.45)  | Any |       |
| Gray et al. 2007 <sup>6</sup><br>(Uganda)           | 2004-2006/ RCT                     | Africa/Low income          | 2004-2006 | Non-clinic-based /4996 | Not reported | 2340/4996 (46.8) | Genital examination, -                | Baseline  | Self-reported /4996 | 854/2474 (34.5) | 860/2522 (34.1)  | -                       | Any | low   |
|                                                     |                                    |                            |           |                        |              |                  | Genital examination, 2268/4589 (49.4) | 6 months  | Self-reported /4589 | 538/2268 (23.7) | 564/2321 (24.3)  | Crude:0.97 (0.85,1.11)  | Any |       |
|                                                     |                                    |                            |           |                        |              |                  | Genital examination, 2253/4503 (50.0) | 12 months | Self-reported /4502 | 566/2252 (25.1) | 572/2250 (25.4)  | Crude:0.98 (0.86,1.12)  | Any |       |
|                                                     |                                    |                            |           |                        |              |                  | Genital examination, 978/1973 (49.6)  | 24 months | Self-reported /1972 | 347/977 (35.5)  | 352/995 (35.4)   | Crude:1.01 (0.84,1.21)  | Any |       |
| Westercamp et al. 2014 <sup>7</sup> (Kenya)         | 2008-2010/<br>Prospective cohort   | Africa/Lower-middle income | 2008-2010 | Non-clinic-based /3186 | 20.0         | 1095/3186 (34.4) | Genital examination, -                | Baseline  | Self-reported /1807 | 500/873 (57.3)  | 551/934 (59.0)   | -                       | Any | 4/0/2 |
|                                                     |                                    |                            |           |                        |              |                  | Genital examination, 644/1471 (43.8)  | 6 months  | Self-reported /1471 | 279/644 (43.3)  | 373/827 (45.1)   | Crude:0.93 (0.76,1.15)  | Any |       |
|                                                     |                                    |                            |           |                        |              |                  | Genital examination, 858/1737 (49.4)  | 12 months | Self-reported /1737 | 333/858 (38.8)  | 353/879 (40.2)   | Crude:0.94 (0.78,1.15)  | Any |       |
|                                                     |                                    |                            |           |                        |              |                  | Genital examination, 1034/1885 (54.9) | 18 months | Self-reported /1885 | 363/1034 (35.1) | 332/851 (39.0)   | Crude:0.85 (0.70,1.02)  | Any |       |
|                                                     |                                    |                            |           |                        |              |                  | Genital examination, 1177/2020 (58.3) | 24 months | Self-reported /2020 | 371/1177 (31.5) | 281/843 (33.3)   | Crude:0.95 (0.79,1.15)  | Any |       |
| Kagaayi et al. 2016 <sup>8</sup><br>(Uganda)        | 2008-2011/<br>Retrospective cohort | Africa/Low income          | 2006-2009 | Non-clinic-based /5494 | 26.1         | 2787/4907 (56.8) | Genital examination, -                | Baseline  | Self-reported /3835 | 208/431 (48.3)  | 1416/3404 (41.6) | -                       | any | 4/1/3 |
|                                                     |                                    |                            |           |                        |              |                  | Genital examination, 578/4907 (11.8)  | 18 months | Self-reported /4015 | 196/453 (43.3)  | 1381/3562 (38.8) | Crude :1.20 (0.99,1.47) | Any |       |
| Govender et al. 2018 <sup>9</sup><br>(South Africa) | 2011-2013/<br>Retrospective cohort | Africa/Upper-middle income | 2011-2013 | Non-clinic-based /981  | 17.3         | -                | Genital examination, -                | Baseline  | Self-reported /449  | 44/195 (22.6)   | 41/254 (16.1)    | -                       | Any | 4/0/2 |
|                                                     |                                    |                            |           |                        |              |                  | Genital examination, -                | 6 months  | Self-reported -     | 32/225          | 44/198           | Crude:0.58              | Any |       |

|                                                 |                                               |                             |              |                        |              |                  |                                        |                    |                     |                 |                  |                         |              |       |
|-------------------------------------------------|-----------------------------------------------|-----------------------------|--------------|------------------------|--------------|------------------|----------------------------------------|--------------------|---------------------|-----------------|------------------|-------------------------|--------------|-------|
|                                                 |                                               |                             |              |                        |              |                  | 393/755 (52.1)                         |                    | /423                | (14.2)          | (22.2)           | (0.35,0.96)             |              |       |
|                                                 |                                               |                             |              |                        |              |                  | Genital examination, 420/858 (49.0)    | 12 months          | Self-reported /523  | 49/232 (21.1)   | 66/291 (22.7)    | Crude:0.91 (0.60,1.39)  | Any          |       |
| Brito et al. 2017 <sup>10</sup> (Dominican)     | 2013-2014/<br>Prospective cohort <sup>f</sup> | America/Upper-middle income | 2013-2014    | Non-clinic-based /454  | 26.0         | -                | Genital examination, 317/634 (50.0)    | 6-24months         | Self-reported /634  | 187/317 (59.0)  | 190/317 (59.9)   | Crude:0.96 (0.70,1.32)  | Any          | 2/2/3 |
| Bailey et al. 1999 <sup>12</sup> (Uganda)       | 1997/<br>Cross-sectional                      | Africa/Low income           | Not reported | Non-clinic-based /365  | 30.8         | -                | Not reported, 188/365 (51.5)           | life time          | Self-reported /365  | 21/188 (11.2)   | 11/177 (6.2)     | Crude:1.90 (0.89,4.06)  | Any          | 1/2/2 |
| Frisch et al. 2011 <sup>27</sup> (Denmark)      | 2005/<br>Cross-sectional                      | Europe/High income          | Not reported | Non-clinic-based /5395 | Not reported | 1453/2345 (62.0) | Self-reported, 125/2345 (5.3)          | life time          | Self-reported /2345 | 96/125 (76.8)   | 1791/2220 (80.7) | Crude:0.79 (0.52,1.22)  | Any          | 1/0/1 |
| Forbes et al. 2012 <sup>14</sup> (Tanzania)     | 2007-2008/<br>Cross-sectional <sup>g</sup>    | Africa/Low income           | 1999-2002    | Non-clinic-based /7300 | 22.0         | 2444/7300 (33.5) | Genital examination, 2252/5698 (39.5)  | Previous 1 month   | Self-reported /5698 | 317/2252 (14.1) | 569/3446 (16.5)  | Crude :0.83 (0.71,0.96) | Any          | 1/0/2 |
| Auvert et al. 2013 <sup>15</sup> (South Africa) | 2007-2008/<br>Cross-sectional <sup>g</sup>    | Africa/Upper-middle income  | 2007-2008    | Non-clinic-based /1998 | Not reported | 262/1988 (13.2)  | Genital examination, 329/1988 (16.5)   | Previous 12 months | Self-reported /1988 | 156/329 (47.4)  | 914/1659 (55.1)  | Crude:0.74 (0.58,0.93)  | Non-marriage | 2/0/2 |
|                                                 | 2010 - 2011/<br>Cross-sectional <sup>g</sup>  |                             | 2008-2010    | Non-clinic-based /3338 | 24.5         | 803/3338 (24.1)  | Genital examination, 1848/ 3338 (55.4) | Previous 12 months | Self-reported /3338 | 986/1848 (53.4) | 744/1490 (49.9)  | Crude:1.15 (1.00,1.31)  | Non-marriage |       |
| Galbraith et al. 2014 <sup>16</sup> (Kenya)     | 2012/<br>Cross-sectional                      | Africa/Lower-middle income  | Not reported | Non-clinic-based /874  | Not reported | 261/847 (30.8)   | Self-reported, 435/874 (49.8)          | life time          | Self-reported /790  | 131/416 (31.5)  | 197/374 (52.7)   | Crude:0.41 (0.31,0.55)  | Any          | 1/0/1 |
| Balekang et al. 2016 <sup>17</sup> (Botswana)   | 2008/<br>Cross-sectional                      | Africa/Upper-middle income  | Not reported | Non-clinic-based /313  | Not reported | 251/301 (83.4)   | Not reported, 53/313 (16.9)            | Previous 12 months | Self-reported /302  | 36/50 (72.0)    | 166/252 (65.9)   | Crude:1.33 (0.68,2.60)  | Any          | 1/0/1 |
| Kibira et al. 2016 <sup>18</sup> (Uganda)       | 2004/<br>Cross-sectional                      | Africa/Low income           | Not reported | Non-clinic-based /9905 | Not reported | 4621/6909 (66.9) | Self-reported, 1792/6906 (25.9)        | Previous 12 months | Self-reported /6907 | 592/1793 (33.0) | 1118/5114 (21.9) | Crude :1.76 (1.56,1.98) | Any          | 1/0/2 |
|                                                 | 2011/<br>Cross-sectional                      |                             |              | Non-clinic-based /9983 | Not reported | 5710/7969 (71.7) | Self-reported, 2228/7969 (28.0)        | Previous 12 months | Self-reported /7968 | 613/2228 (27.5) | 1168/5740 (20.3) | Crude :1.49 (1.33,1.66) | Any          |       |
| Zungu et al. 2016 <sup>19</sup> (South Africa)  | 2012/<br>Cross-sectional                      | Africa/Upper-middle income  | Not reported | Non-clinic-based /8240 | Not reported | -                | Self-reported, 2121/8240 (25.7)        | Previous 12 months | Self-reported /8240 | 271/2121 (12.8) | 504/6119 (8.2)   | Crude:1.63 (1.40,1.91)  | Any          | 1/0/2 |
| Westercamp et al. 2017 <sup>21</sup> (Kenya)    | 2008-2009/<br>Cross-sectional                 | Africa/Lower-middle income  | Not reported | Non-clinic-based /1210 | 24.0         | 326/675 (48.3)   | Self-reported, 215/675 (31.9)          | Previous 12 months | Self-reported /675  | 58/215 (23.0)   | 99/460 (21.5)    | Crude:1.35 (0.93,1.96)  | Any          | 1/0/1 |
|                                                 | 2011/<br>Cross-sectional                      |                             | Not reported | Non-clinic-based /1540 | 26.0         | 823/1371 (60.0)  | Self-reported, 669/1371 (48.8)         | Previous 12 months | Self-reported /1371 | 81/669 (12.1)   | 98/702 (14.0)    | Crude:0.85 (0.62,1.16)  | Any          |       |

|                                                      |                                            |                                          |              |                        |      |                     |                                          |                       |                        |                   |                   |                           |     |       |
|------------------------------------------------------|--------------------------------------------|------------------------------------------|--------------|------------------------|------|---------------------|------------------------------------------|-----------------------|------------------------|-------------------|-------------------|---------------------------|-----|-------|
|                                                      | 2013/<br>Cross-sectional                   |                                          | Not reported | Non-clinic-based /1442 | 27·0 | 741/1308<br>(56·7)  | Self-reported, 781/1308<br>(59·7)        | Previous 12<br>months | Self-reported<br>/1308 | 141/781<br>(18·1) | 75/527<br>(14·2)  | Crude:1·33<br>(0·98,1·80) | Any |       |
| Ortblad, et al. 2019 <sup>22</sup><br>(South Africa) | 2009-2015/<br>Cross-sectional <sup>§</sup> | Africa/Upper-middle income               | Not reported | Non-clinic-based /5127 | 17·0 | --                  | Self-reported,<br>1235/5127 (24·1)       | Previous 12<br>months | Self-reported<br>/5127 | 65/1235<br>(5·3)  | 245/3892<br>(6·3) | Crude:0·83<br>(0·62,1·10) | Any | 2/0/2 |
| Kufa et al. 2020 <sup>23</sup><br>(South Africa)     | 2017-2018/<br>Cross-sectional              | Africa/Upper-middle income               | Not reported | Non-clinic-based /750  | 27·0 | -                   | Genital examination,<br>166/496 (33·5)   | Previous 3<br>months  | Self-reported<br>/496  | 89/166<br>(53·6)  | 169/330<br>(51·1) | Crude:1·10<br>(0·76,1·60) | Any | 3/1/2 |
| Wei et al. 2018 <sup>24</sup><br>(China)             | 2004/<br>Cross-sectional <sup>§</sup>      | Western Pacific<br>/ Upper-middle income | Not reported | Non-clinic-based /673  | 28·0 | 499/673<br>(74·1)   | Genital examination,<br>113/673 (16·8)   | Not<br>reported       | Self-reported<br>/673  | 15/113<br>(13·3)  | 72/560<br>(12·9)  | Crude:0·74<br>(0·39,1·41) | Any | 4/1/1 |
| Mwandi et al. 2012 <sup>25</sup><br>(Kenya)          | 2007/<br>Cross-sectional                   | Africa/Lower-middle income               | Not reported | Non-clinic-based /8883 | 32·0 | 4469/7678<br>(58·2) | Genital examination,<br>6586/7678 (85·8) | Previous 12<br>months | Self-reported<br>/5747 | 427/4426<br>(9·6) | 121/680<br>(17·8) | Crude:0·49<br>(0·40,0·61) | Any | 3/1/1 |

<sup>a</sup> Studies were grouped by country in which the study was conducted.

<sup>b</sup> Prospective period and retrospective period were used in cohort, and retrospective period was used in cross-sectional study.

<sup>c</sup> The analytic sample was used to calculate the association between circumcision and condom use and multiple sex partner. Discrepancies between analytic samples and overall sample size were due to missing data.

<sup>d</sup> ORs were extracted directly from articles were available, with adjusted ORs extracted preferentially over unadjusted odds ratios. Crude ORs were calculated based on reconstructed fourfold tables if they were not reported.

<sup>e</sup> The adapted version of the Newcastle-Ottawa Scale was used to assess risk of bias of studies along three aspects: participant selection (4 criteria), comparability between study groups (1 criterion), and assessment of outcome or exposure (3 criteria for cohort, 2 criteria for cross-sectional studies).

<sup>f</sup> Study did not have a control group at baseline, and comparison before and after follow-up.

<sup>§</sup> Cross-sectional information from cohort.

A total of 23 studies reported the number of sex partners ( $\geq 2$  vs.  $\leq 1$ ).

**Supplementary Table S3. Univariate meta-regression analysis of the associations between MMC and condomless sex and multiple sex partners**

| Variable                                                | Condomless sex              |                |                                                              |                                                          | Multiple sex partners       |                |                                                              |                                                          |
|---------------------------------------------------------|-----------------------------|----------------|--------------------------------------------------------------|----------------------------------------------------------|-----------------------------|----------------|--------------------------------------------------------------|----------------------------------------------------------|
|                                                         | <i>k</i> <sup>a</sup> , No. | <i>P</i> value | Variance explained<br><i>R</i> <sup>2</sup> (%) <sup>b</sup> | Meta-regression coefficient<br>(95% confidence interval) | <i>k</i> <sup>a</sup> , No. | <i>P</i> value | Variance explained<br><i>R</i> <sup>2</sup> (%) <sup>b</sup> | Meta-regression coefficient<br>(95% confidence interval) |
| Study design <sup>c</sup>                               | 30                          | 0.51           | 0.0                                                          | -0.92 (-3.75, 1.90)                                      | 27                          | 0.56           | 0.0                                                          | 7.06 (-17.61, 31.72)                                     |
| Recruitment setting                                     | 30                          | 0.57           | 0.0                                                          | 1.53 (-3.94, 7.01)                                       | 27                          | 0.61           | 0.0                                                          | 11.47 (-34.08, 57.02)                                    |
| Recruitment time                                        | 30                          | 0.35           | 0.0                                                          | -1.58 (-4.96, 1.80)                                      | 27                          | 0.07           | 9.1                                                          | 24.87 (-2.10, 51.84)                                     |
| Method of ascertaining circumcision status <sup>d</sup> | 28                          | 0.14           | 4.5                                                          | -2.13 (-5.03, 0.77)                                      | 25                          | 0.50           | 0.0                                                          | 8.55 (-17.52, 34.62)                                     |
| Age <sup>e</sup>                                        | 21                          | 0.34           | 0.0                                                          | 1.49 (-1.69, 4.68)                                       | 18                          | 0.38           | 0.0                                                          | 15.35 (-20.37, 51.06)                                    |
| %Circumcision <sup>f</sup>                              | 30                          | 0.20           | 2.4                                                          | 1.70 (-0.97, 4.38)                                       | 27                          | 0.46           | 0.0                                                          | -8.74 (-32.48, 15.00)                                    |
| Study quality <sup>g</sup>                              | 30                          | 0.20           | 2.5                                                          | -1.72 (-4.40, 0.94)                                      | 27                          | 0.69           | 0.0                                                          | 4.67 (-19.26, 28.59)                                     |

<sup>a</sup> The number of individual association estimates.

<sup>b</sup> The fraction of between-study variance explained by study-level variables.

<sup>c</sup> Cross-sectional study vs. RCT / cohort study.

<sup>d</sup> Genital examination vs. self-report.

<sup>e</sup> ≤ 25 vs. >25 years old.

<sup>f</sup> ≤ 45% vs. >45%.

<sup>g</sup> Low risk bias vs. high risk bias.

**Supplementary Table S4. Risk of bias assessment for cross-sectional studies – Newcastle-Ottawa Scale (adaptation)**

| Study (country)                                  | Selection                       |             |                 |                                         | Comparability based<br>on design and<br>analysis | Outcome                  |                  | Total score | Overall risk of bias* |
|--------------------------------------------------|---------------------------------|-------------|-----------------|-----------------------------------------|--------------------------------------------------|--------------------------|------------------|-------------|-----------------------|
|                                                  | Representative of<br>the sample | Sample size | Non-respondents | Ascertainment of<br>circumcision status |                                                  | Assessment of<br>outcome | Statistical test |             |                       |
| Bailey et al. 1999 <sup>12</sup> (Uganda)        | 1                               | 0           | 0               | 0                                       | 2                                                | 1                        | 1                | 5           | Low                   |
| Frisch et al. 2011 <sup>27</sup> (Denmark)       | 1                               | 0           | 0               | 0                                       | 0                                                | 1                        | 0                | 2           | High                  |
| Ayiga et al. 2011 <sup>13</sup> (Botswana)       | 1                               | 0           | 0               | 0                                       | 0                                                | 1                        | 0                | 2           | High                  |
| Forbes et al. 2012 <sup>14</sup> (Tanzania)      | 1                               | 0           | 0               | 0                                       | 0                                                | 1                        | 1                | 3           | High                  |
| Auvert et al. 2013 <sup>15</sup> (South Africa)  | 1                               | 0           | 0               | 1                                       | 0                                                | 1                        | 1                | 4           | High                  |
| Galbraith et al. 2014 <sup>16</sup> (Kenya)      | 1                               | 0           | 0               | 0                                       | 0                                                | 1                        | 0                | 2           | High                  |
| Balekang et al. 2016 <sup>17</sup> (Botswana)    | 1                               | 0           | 0               | 0                                       | 0                                                | 1                        | 0                | 2           | High                  |
| Kibira et al. 2016 <sup>18</sup> (Uganda)        | 1                               | 0           | 0               | 0                                       | 0                                                | 1                        | 1                | 3           | High                  |
| Zungu et al. 2016 <sup>19</sup> (South Africa)   | 1                               | 0           | 0               | 0                                       | 0                                                | 1                        | 1                | 3           | High                  |
| George et al. 2017 <sup>20</sup> (South Africa)  | 1                               | 0           | 1               | 0                                       | 0                                                | 1                        | 0                | 3           | High                  |
| Westercamp et al. 2017 <sup>21</sup> (Kenya)     | 1                               | 0           | 0               | 0                                       | 0                                                | 1                        | 0                | 2           | High                  |
| Ortblad et al. 2019 <sup>22</sup> (South Africa) | 1                               | 0           | 1               | 0                                       | 0                                                | 1                        | 1                | 4           | High                  |
| Kufa et al. 2020 <sup>23</sup> (South Africa)    | 1                               | 0           | 1               | 1                                       | 0                                                | 2                        | 1                | 6           | Low                   |
| Wei et al. 2018 <sup>24</sup> (China)            | 1                               | 1           | 1               | 1                                       | 1                                                | 1                        | 0                | 6           | Low                   |
| Mwandi et al. 2012 <sup>25</sup> (Kenya)         | 1                               | 1           | 1               | 0                                       | 1                                                | 1                        | 0                | 5           | Low                   |
| Reed et al. 2012 <sup>26</sup> (Swaziland)       | 1                               | 1           | 1               | 0                                       | 1                                                | 1                        | 0                | 5           | Low                   |

\* High risk: score ≤ 4; low risk: score ≥ 5.

**Supplementary Table S5. Risk of bias assessment for cohort studies – Newcastle-Ottawa Scale (adaptation)**

| Source                                           | Selection                    |                                          |                                      |                                                                          | Comparability based on design and analysis | Outcome               |                                                 |                                  | Total score | Overall risk of bias |
|--------------------------------------------------|------------------------------|------------------------------------------|--------------------------------------|--------------------------------------------------------------------------|--------------------------------------------|-----------------------|-------------------------------------------------|----------------------------------|-------------|----------------------|
|                                                  | Representative of the sample | Selection of the non-intervention cohort | Ascertainment of circumcision status | Demonstration that outcome of interest was not present at start of study |                                            | Assessment of outcome | Was follow up long enough for outcomes to occur | Adequacy of follow up of cohorts |             |                      |
| Kong et al. 2012 <sup>1</sup> (Uganda)           | 1                            | 1                                        | 1                                    | 1                                                                        | 2                                          | 1                     | 1                                               | 0                                | 8           | Low                  |
| Feldblum et al. 2015 <sup>2</sup> (Kenya)        | 0                            | 0                                        | 1                                    | 1                                                                        | 1                                          | 1                     | 1                                               | 1                                | 6           | Low                  |
| Mukudu et al. 2019 <sup>3</sup> (South Africa)   | 0                            | 0                                        | 1                                    | 1                                                                        | 2                                          | 1                     | 1                                               | 1                                | 7           | Low                  |
| Agot et al. 2007 <sup>4</sup> (Kenya)            | 1                            | 1                                        | 1                                    | 1                                                                        | 1                                          | 1                     | 1                                               | 1                                | 8           | Low                  |
| Westercamp et al. 2014 <sup>7</sup> (Kenya)      | 1                            | 1                                        | 1                                    | 1                                                                        | 0                                          | 1                     | 1                                               | 0                                | 6           | Low                  |
| Kagaayi et al. 2016 <sup>8</sup> (Uganda)        | 1                            | 1                                        | 1                                    | 1                                                                        | 1                                          | 1                     | 1                                               | 1                                | 8           | Low                  |
| Govender et al. 2018 <sup>9</sup> (South Africa) | 1                            | 1                                        | 1                                    | 1                                                                        | 0                                          | 1                     | 1                                               | 0                                | 6           | Low                  |
| Brito et al. 2017 <sup>10</sup> (Dominican)      | 0                            | 0                                        | 1                                    | 1                                                                        | 2                                          | 1                     | 1                                               | 1                                | 7           | Low                  |

High risk: score  $\leq$  4; low risk: score  $\geq$  5.

**Supplementary Table S6. Risk of bias assessment for interventional studies - Cochrane Collaboration's tool**

| Study (country)                                  | Random sequence generation | Allocation concealment | Blinding of outcome assessment | Incomplete outcome data | Selective reporting | Other forms of bias | Overall risk of bias |
|--------------------------------------------------|----------------------------|------------------------|--------------------------------|-------------------------|---------------------|---------------------|----------------------|
| Tarnaud et al. 2011 <sup>11</sup> (South Africa) | Low                        | Unclear                | Low                            | Low                     | Low                 | Low <sup>a</sup>    | Low                  |
| Bailey et al. 2007 <sup>5</sup> (Kenya)          | Low                        | Unclear                | Unclear                        | Low                     | Low                 | Low <sup>a</sup>    | Low                  |
| Gray et al. 2007 <sup>6</sup> (Uganda)           | Low                        | Unclear                | Unclear                        | Low                     | Low                 | Low <sup>a</sup>    | Low                  |

<sup>a</sup> If a trial terminated early but substantial evidence had been collected, it is considered as low risk of bias.



**Supplementary Table S7. Subgroup meta-analyses of studies conducted after 2007 of the association between MMC and HIV risk compensation among heterosexual men**

|                                   | Condomless sex |              |                          |                | Multiple sex partners |              |                          |                |
|-----------------------------------|----------------|--------------|--------------------------|----------------|-----------------------|--------------|--------------------------|----------------|
|                                   | Reports (n)    | Men (n)      | Pooled OR (95%CI)        | I-squared, (%) | Reports (n)           | Men (n)      | Pooled OR (95%CI)        | I-squared, (%) |
| <b>Income of country</b>          |                |              |                          |                |                       |              |                          |                |
| High                              | 0              | 0            | -                        | -              | 0                     | 0            | -                        | -              |
| Low and Middle                    | 24             | 46892        | 0.90 (0.76, 1.06)        | 90.5           | 21                    | 52675        | 0.99 (0.84, 1.16)        | 89.7           |
| <b>Study design</b>               |                |              |                          |                |                       |              |                          |                |
| Cohort / RCT                      | 7              | 7804         | 0.99 (0.75, 1.29)        | 79.5           | 7                     | 9595         | 1.03 (0.87, 1.21)        | 56.9           |
| Cross-sectional                   | 17             | 39088        | 0.86(0.70, 1.06)         | 92.5           | 14                    | 43080        | 0.96 (0.77, 1.20)        | 92.8           |
| <b>Mean or median age, year</b>   |                |              |                          |                |                       |              |                          |                |
| ≤ 25                              | 9              | 23053        | 0.82 (0.63, 1.08)        | 93.3           | 7                     | 17721        | 1.03 (0.87, 1.22)        | 71.6           |
| > 25                              | 8              | 11891        | 0.94 (0.77, 1.15)        | 69.3           | 8                     | 14069        | 0.96 (0.73, 1.26)        | 84.5           |
| <b>Recruitment setting</b>        |                |              |                          |                |                       |              |                          |                |
| Non-clinic-based                  | 22             | 46077        | 0.88 (0.74, 1.04)        | 90.7           | 19                    | 51860        | 0.96 (0.81, 1.14)        | 90.5           |
| Clinic-based                      | 2              | 815          | 1.22 (0.41, 3.62)        | 92.7           | 2                     | 815          | 1.34 (0.77, 2.32)        | 70.5           |
| <b>Circumcision assessment</b>    |                |              |                          |                |                       |              |                          |                |
| Genital examination               | 13             | 17384        | 0.93 (0.71, 1.21)        | 91.9           | 12                    | 21788        | 0.99 (0.87, 1.12)        | 63.9           |
| Self-reported                     | 10             | 29279        | 0.85 (0.69, 1.05)        | 89.0           | 8                     | 30585        | 0.94 (0.65, 1.36)        | 95.5           |
| <b>Circumcision, %</b>            |                |              |                          |                |                       |              |                          |                |
| ≤ 45                              | 13             | 30280        | 0.88 (0.70, 1.11)        | 92.1           | 11                    | 35972        | 1.01 (0.79, 1.30)        | 92.0           |
| > 45                              | 11             | 16612        | 0.92 (0.73, 1.16)        | 87.4           | 10                    | 16703        | 0.96 (0.77, 1.18)        | 84.1           |
| <b>Risk of bias</b>               |                |              |                          |                |                       |              |                          |                |
| Low                               | 11             | 21795        | 0.98 (0.80, 1.21)        | 81.8           | 10                    | 15870        | 0.96 (0.77, 1.20)        | 81.8           |
| High                              | 13             | 25097        | 0.84 (0.65, 1.07)        | 93.5           | 11                    | 36805        | 1.01 (0.80, 1.27)        | 92.3           |
| <b>Married/cohabiting, %</b>      |                |              |                          |                |                       |              |                          |                |
| ≤ 50                              | 6              | 15330        | 0.69 (0.45, 1.05)        | 96.0           | 6                     | 18498        | 0.85 (0.65, 1.10)        | 89.7           |
| > 50                              | 8              | 16241        | 1.02 (0.84, 1.24)        | 70.1           | 8                     | 31592        | 1.00 (0.72, 1.37)        | 92.2           |
| <b>Priority countries for MMC</b> | 21             | 38511        | 0.90 (0.75, 1.09)        | 91.6           | 19                    | 51368        | 0.99 (0.83, 1.17)        | 90.7           |
| <b>All samples</b>                | <b>24</b>      | <b>46892</b> | <b>0.90 (0.76, 1.06)</b> | <b>90.5</b>    | <b>21</b>             | <b>52675</b> | <b>0.99 (0.84, 1.16)</b> | <b>89.7</b>    |

Supplementary Figure S1. Sensitivity analysis of OR estimates on the association between MMC and condomless sex among heterosexual men

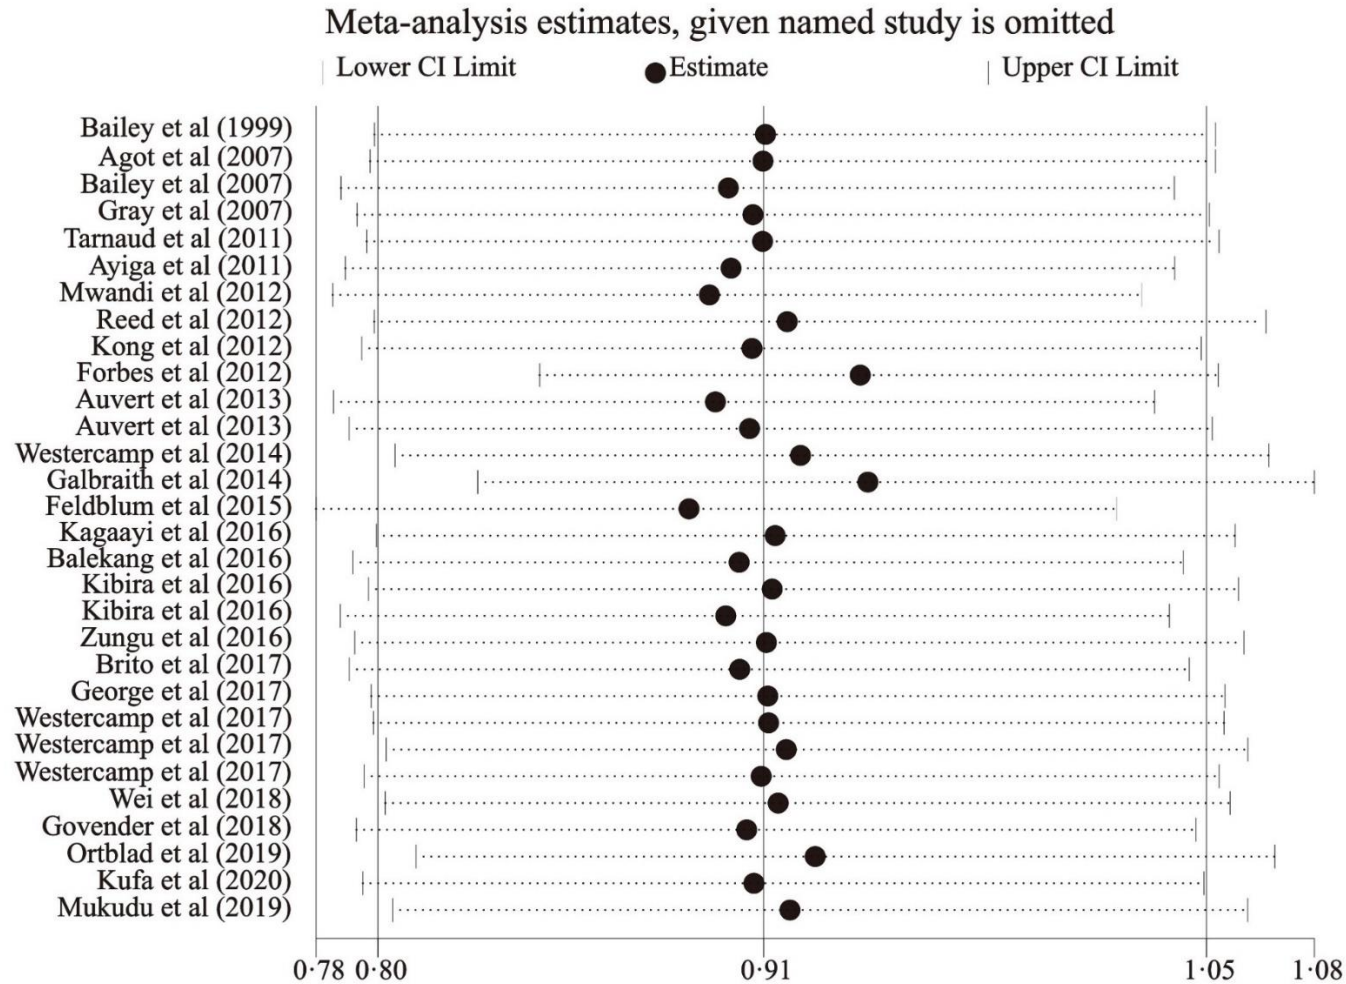

Supplementary Figure S2. Sensitivity analysis of OR estimates on the association between MMC and multiple sex partners among heterosexual men

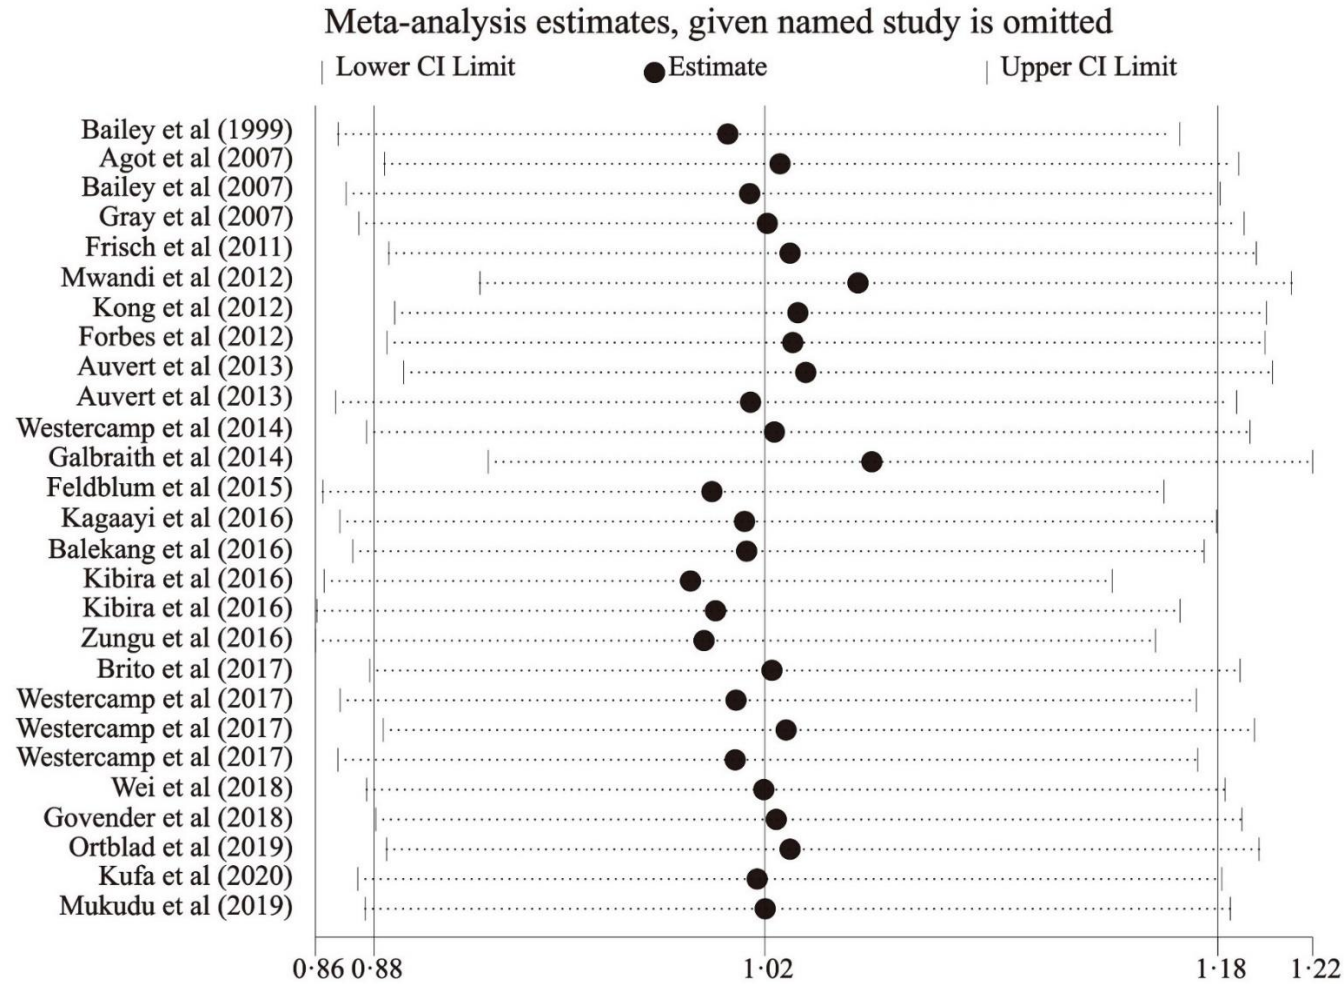

Supplementary Figure S3. Funnel plot of the log OR estimates of the association between MMC and condomless sex among heterosexual men

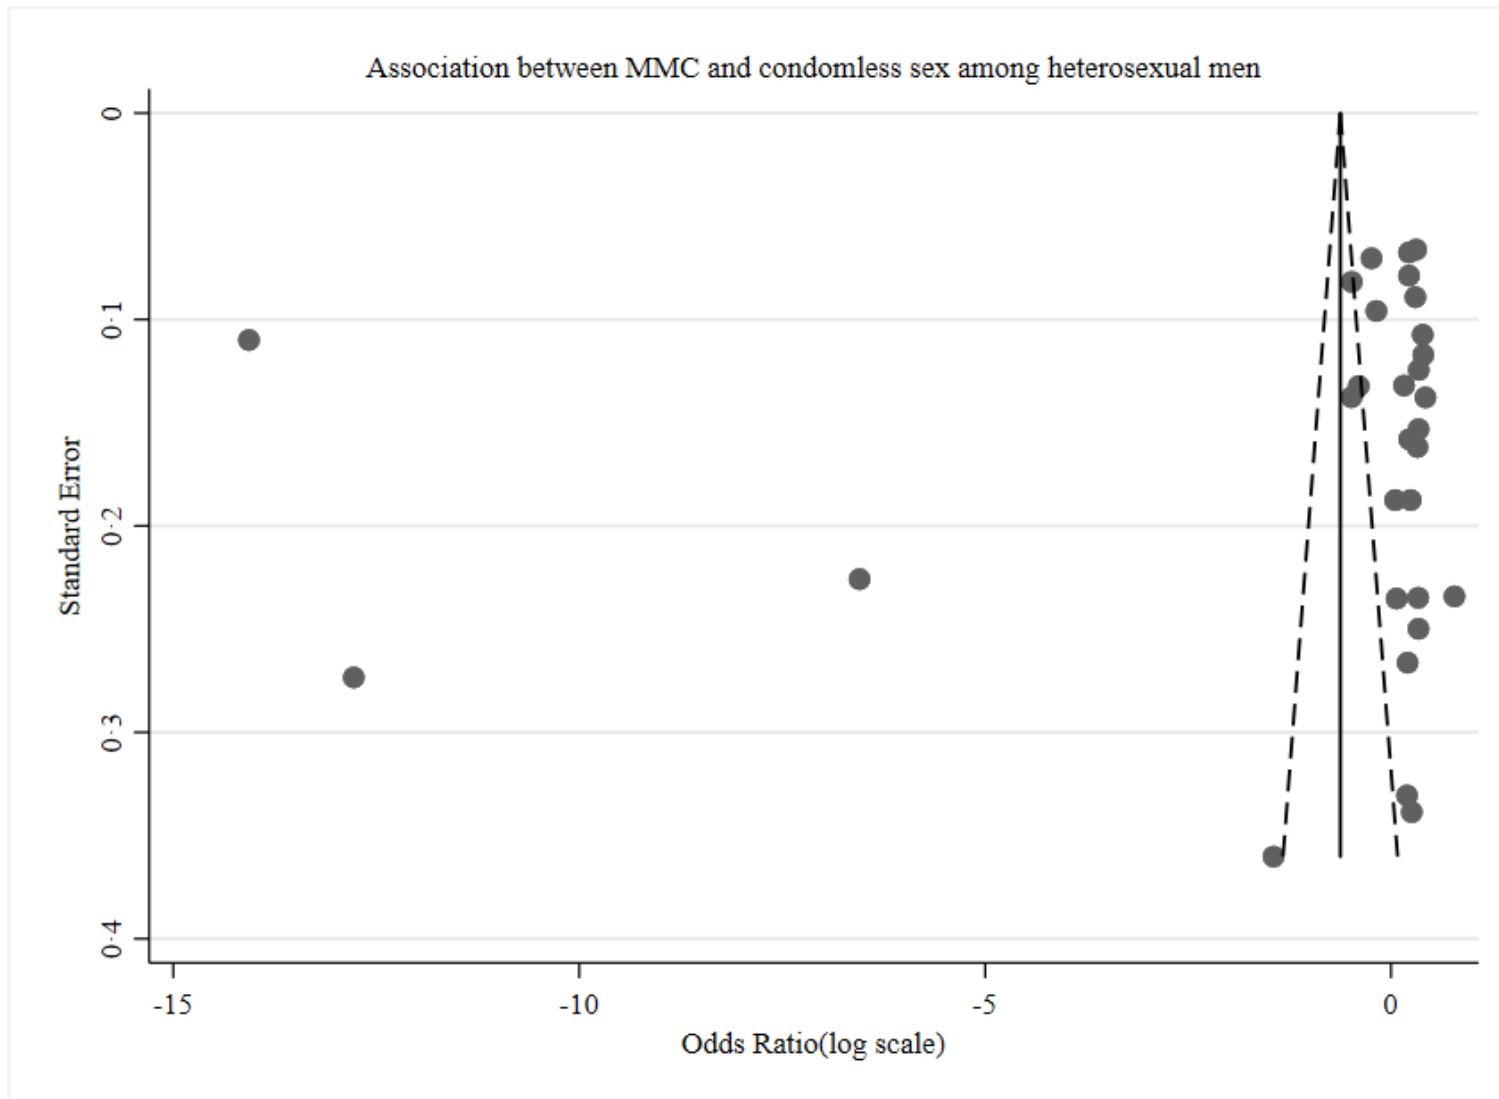

Supplementary Figure S4. Funnel plot of the log OR estimates of the association between MMC and multiple sex partners among heterosexual men

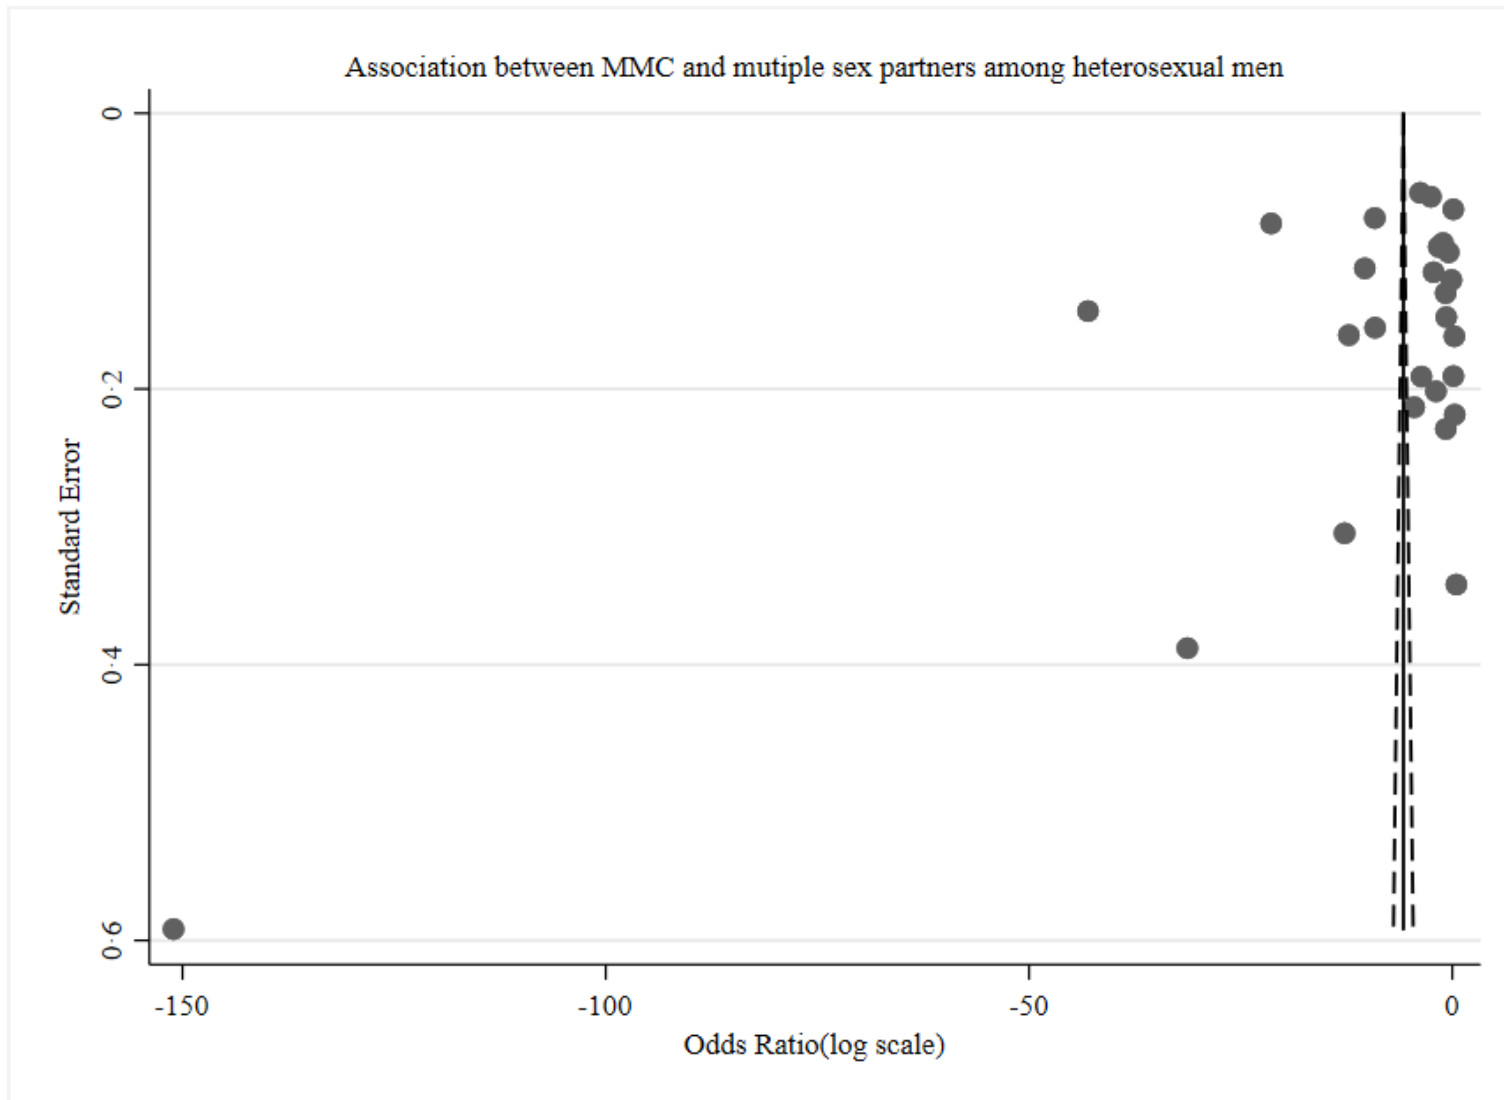

## References:

1. Kong X, Kigozi G, Nalugoda F, et al. Assessment of changes in risk behaviors during 3 years of posttrial follow-up of male circumcision trial participants uncircumcised at trial closure in Rakai, Uganda. *Am J Epidemiol* 2012; **176**(10): 875-85.
2. Feldblum PJ, Okech J, Ochieng R, et al. Longer-Term Follow-Up of Kenyan Men Circumcised Using the ShangRing Device. *PloS one* 2015; **10**(9): e0137510.
3. Mukudu H, Dietrich J, Otworld K, et al. Voluntary medical male circumcision (VMMC) for prevention of heterosexual transmission of HIV and risk compensation in adult males in Soweto: Findings from a programmatic setting. *PloS one* 2019; **14**(3): e0213571.
4. Agot KE, Kiarie JN, Nguyen HQ, Odhiambo JO, Onyango TM, Weiss NS. Male circumcision in Siaya and Bondo Districts, Kenya: prospective cohort study to assess behavioral disinhibition following circumcision. *J Acquir Immune Defic Syndr* 2007; **44**(1): 66-70.
5. Bailey RC, Moses S, Parker CB, et al. Male circumcision for HIV prevention in young men in Kisumu, Kenya: a randomised controlled trial. *Lancet* 2007; **369**(9562): 643-56.
6. Gray RH, Kigozi G, Serwadda D, et al. Male circumcision for HIV prevention in men in Rakai, Uganda: a randomised trial. *Lancet* 2007; **369**(9562): 657-66.
7. Westercamp N, Agot K, Jaoko W, Bailey RC. Risk compensation following male circumcision: results from a two-year prospective cohort study of recently circumcised and uncircumcised men in Nyanza Province, Kenya. *AIDS Behav* 2014; **18**(9): 1764-75.
8. Kagaayi J, Kong X, Kigozi G, et al. Self-selection of male circumcision clients and behaviors following circumcision in a service program in Uganda. *Aids* 2016; **30**(13): 2125-9.
9. Govender K, George G, Beckett S, Montague C, Frohlich J. Risk Compensation Following Medical Male Circumcision: Results from a 1-Year Prospective Cohort Study of Young School-Going Men in KwaZulu-Natal, South Africa. *Int J Behav Med* 2018; **25**(1): 123-30.
10. Brito MO, Khosla S, Pananookooln S, et al. Sexual Pleasure and Function, Coital Trauma, and Sex Behaviors After Voluntary Medical Male Circumcision Among Men in the Dominican Republic. *J Sex Med* 2017; **14**(4): 526-34.
11. Tarnaud C, Lissouba P, Cutler E, Puren A, Taljaard D, Auvert B. Association of low-risk human papillomavirus infection with male circumcision in young men: results from a longitudinal study conducted in Orange Farm (South Africa). *Infect Dis Obstet Gynecol* 2011; **2011**: 567408.
12. Bailey RC, Neema S, Othieno R. Sexual behaviors and other HIV risk factors in circumcised and uncircumcised men in Uganda. *J Acquir Immune Defic Syndr* 1999; **22**(3): 294-301.
13. Ayiga N, Letamo G. Impact of male circumcision on HIV risk compensation through the impediment of condom use in Botswana. *Afr Health Sci* 2011; **11**(4): 550-9.
14. Forbes HJ, Doyle AM, Maganja K, et al. Rapid increase in prevalence of male circumcision in rural Tanzania in the absence of a promotional campaign. *PloS one* 2012; **7**(7): e40507.
15. Auvert B, Taljaard D, Rech D, et al. Association of the ANRS-12126 male circumcision project with HIV levels among men in a South African township: evaluation of effectiveness using cross-sectional surveys. *PLoS Med* 2013; **10**(9): e1001509.
16. Galbraith JS, Ochieng A, Mwalili S, et al. Status of voluntary medical male circumcision in Kenya: findings from 2 nationally representative surveys in Kenya, 2007 and 2012. *J Acquir Immune Defic Syndr* 2014; **66 Suppl 1**: S37-45.
17. Balekang GB, Dintwa KF. A comparison of risky sexual behaviours between circumcised and uncircumcised men aged 30-44 years in Botswana. *Afr Health Sci* 2016; **16**(1): 105-15.
18. Kibira SP, Sandoy IF, Daniel M, Atuyambe LM, Makumbi FE. A comparison of sexual risk behaviours and HIV seroprevalence among circumcised and uncircumcised men before and

- after implementation of the safe male circumcision programme in Uganda. *BMC public health* 2016; **16**: 7.
19. Zungu NP, Simbayi LC, Mabaso M, et al. HIV risk perception and behavior among medically and traditionally circumcised males in South Africa. *BMC public health* 2016; **16**: 357.
  20. George G, Govender K, Beckett S, Montague C, Frohlich J. Factors associated with the take-up of voluntary medical male circumcision amongst learners in rural KwaZulu-Natal. *Afr J AIDS Res* 2017; **16**(3): 251-6.
  21. Westercamp M, Jaoko W, Mehta S, Abuor P, Siambe P, Bailey RC. Changes in Male Circumcision Prevalence and Risk Compensation in the Kisumu, Kenya Population, 2008-2013. *J Acquir Immune Defic Syndr* 2017; **74**(2): e30-e7.
  22. Ortblad KF, Harling G, Chimbindi N, Tanser F, Salomon JA, Bärnighausen T. Does Incident Circumcision Lead to Risk Compensation? Evidence from a Population Cohort in KwaZulu-Natal, South Africa. *J Acquir Immune Defic Syndr* 2019; **80**(3): 269-75.
  23. Kufa T, Radebe F, Maseko V, Puren A, Kularatne R. Medical Male Circumcision and Associations Among Sexually Transmitted Infections Service Attendees. *AIDS Behav* 2020; **24**(5): 1422-31.
  24. Wei FX, Guo M, Ma XJ, et al. The impact of male circumcision on the natural history of genital HPV infection: a prospective cohort study. *Chi J Prev Med* 2018; **52**(5): 486-92.
  25. Mwandu Z, Bunnell R, Cherutich P, et al. Male circumcision programmes in Kenya: lessons from the Kenya AIDS Indicator Survey 2007. *B World Health Organ* 2012; **90**(9): 642-51.
  26. Reed JB, Mirira M, Grund J, et al. Male circumcision in Swaziland: Demographics, behaviours and HIV prevalence. *J Int Aids Soc* 2012; **15**: 137.
  27. Frisch M, Lindholm M, Gronbaek M. Male circumcision and sexual function in men and women: a survey-based, cross-sectional study in Denmark. *Int J Epidemiol* 2011; **40**(5): 1367-81.
